# Supplementary material for: A universal supramolecular assembly strategy for achieving efficient tunable white emission and anti-counterfeiting in antimony doped tin(iv)-based vacancy-ordered double perovskites
Source: Royal Society of Chemistry journal article supplement (doi:10.1039/d3tc04596j), 2024-01-01
Supplement: d3tc04596j1.pdf [file d3tc04596j1.pdf]

**Supplementary Information**

**A Universal Supramolecular Assembly Strategy for  
Achieving Efficient Tunable White Emission and Anti-  
counterfeiting in Antimony doped Tin(IV)-based Vacancy-  
Ordered Double Perovskites**

Minghui Lu,<sup>a</sup> Hui Peng,<sup>\*a</sup> Qilin Wei,<sup>b</sup> Shichao Zhou,<sup>a</sup> Yongrun Dong,<sup>a</sup> Shuiyue Yu,<sup>a</sup> Jialong  
Zhao,<sup>c</sup> Xianci Zhong<sup>d</sup> and Bingsuo Zou<sup>\*a</sup>

*<sup>a</sup>State Key Laboratory of Featured Metal Materials and Life-cycle Safety for Composite  
Structures, MOE Key Laboratory of New Processing Technology for Nonferrous Metals and  
Materials, and School of Resources, Environment and Materials, Guangxi University, Nanning  
530004, China.*

*<sup>b</sup>School of Chemistry and Chemical Engineering, Shandong University, Jinan 250100, China.*

*<sup>c</sup>School of Physical Science and Technology, Guangxi University, Nanning 530004, China.*

*<sup>d</sup>Key Laboratory of Disaster Prevention and Structural Safety of Ministry of Education, Guangxi  
University, Nanning 530004, China*

\*Email: penghuimaterial@163.com (Hui Peng); zoubs@gxu.edu.cn (Bingsuo Zou)

**Table S1.** Elemental analysis of Sb/(Sn+Sb) ratio in (CsC)<sub>2</sub>SnCl<sub>6</sub>:Sb<sup>3+</sup> single crystal via EDS.

| Feed ratio | Sn   | Sb   | Measured ratio |
|------------|------|------|----------------|
| 1 %        | 6.66 | 0.28 | 4.035 %        |
| 5 %        | 8.36 | 0.58 | 6.488 %        |
| 10 %       | 5.76 | 0.49 | 7.767 %        |
| 20 %       | 5.64 | 1.38 | 19.658 %       |
| 40 %       | 5.34 | 1.81 | 25.315 %       |
| 60 %       | 6.67 | 1.98 | 22.890 %       |

**Table S2.** Elemental analysis of Sb/(Sn+Sb) ratio in (CsC)<sub>2</sub>SnCl<sub>6</sub>:Sb<sup>3+</sup> via ICP-OES.

| Feed ratio | Sn      | Sb     | Measured ratio |
|------------|---------|--------|----------------|
| 1 %        | 111.578 | 6.754  | 5.708 %        |
| 5 %        | 110.033 | 8.531  | 7.195 %        |
| 10 %       | 105.376 | 11.876 | 10.129 %       |
| 20 %       | 100.200 | 16.026 | 13.789 %       |
| 40 %       | 88.420  | 21.948 | 19.886 %       |
| 60 %       | 78.237  | 23.997 | 23.468 %       |

**Table S3.** Summary of the emission wavelengths and the PL intensity ratio of **Band A** and **Band B** in Sb<sup>3+</sup>-doped (AC)<sub>2</sub>SnCl<sub>6</sub> (A = K, Rb, Cs) compounds under excitation by a Xenon lamp at 322 nm and 370 nm.

| Compounds                                               | $\lambda_{\text{ex}} = 322 \text{ nm}$ |                    |                                         | $\lambda_{\text{ex}} = 370 \text{ nm}$ | $\lambda_{\text{em}} = \text{Band A (nm)}$ | $\lambda_{\text{em}} = \text{Band B (nm)}$ | Stokes Shift (nm) |
|---------------------------------------------------------|----------------------------------------|--------------------|-----------------------------------------|----------------------------------------|--------------------------------------------|--------------------------------------------|-------------------|
|                                                         | <b>Band A (nm)</b>                     | <b>Band B (nm)</b> | $I_{\text{Band A}} / I_{\text{Band B}}$ |                                        |                                            |                                            |                   |
| (KC) <sub>2</sub> SnCl <sub>6</sub> : Sb <sup>3+</sup>  | 492                                    | 654                | 80%                                     | 654                                    | 321                                        | 370                                        | 284               |
| (RbC) <sub>2</sub> SnCl <sub>6</sub> : Sb <sup>3+</sup> | 496                                    | 659                | 73%                                     | 657                                    | 321                                        | 370                                        | 287               |
| (CsC) <sub>2</sub> SnCl <sub>6</sub> : Sb <sup>3+</sup> | 509                                    | 669                | 47%                                     | 662                                    | 322                                        | 368                                        | 294               |

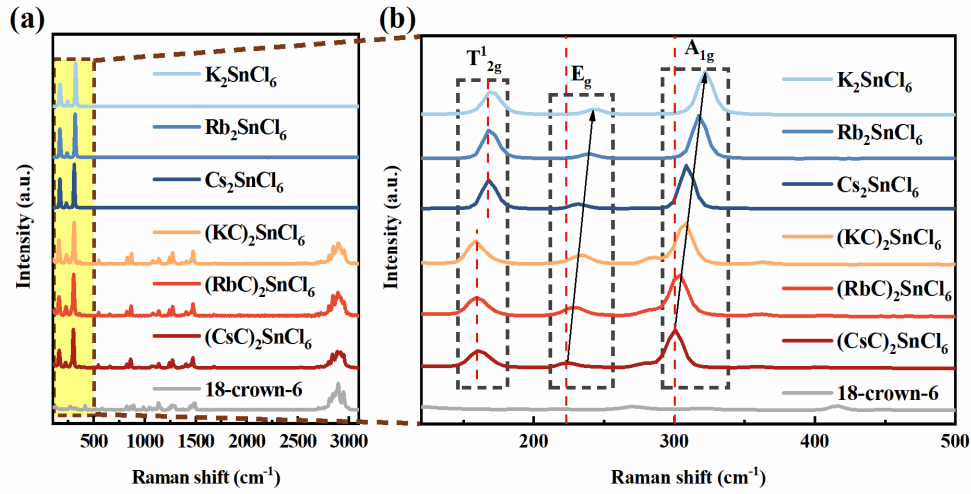

**Fig. S1** Raman spectra of 18-crown-6 ether,  $A_2\text{SnCl}_6$  and  $(AC)_2\text{SnCl}_6$ .

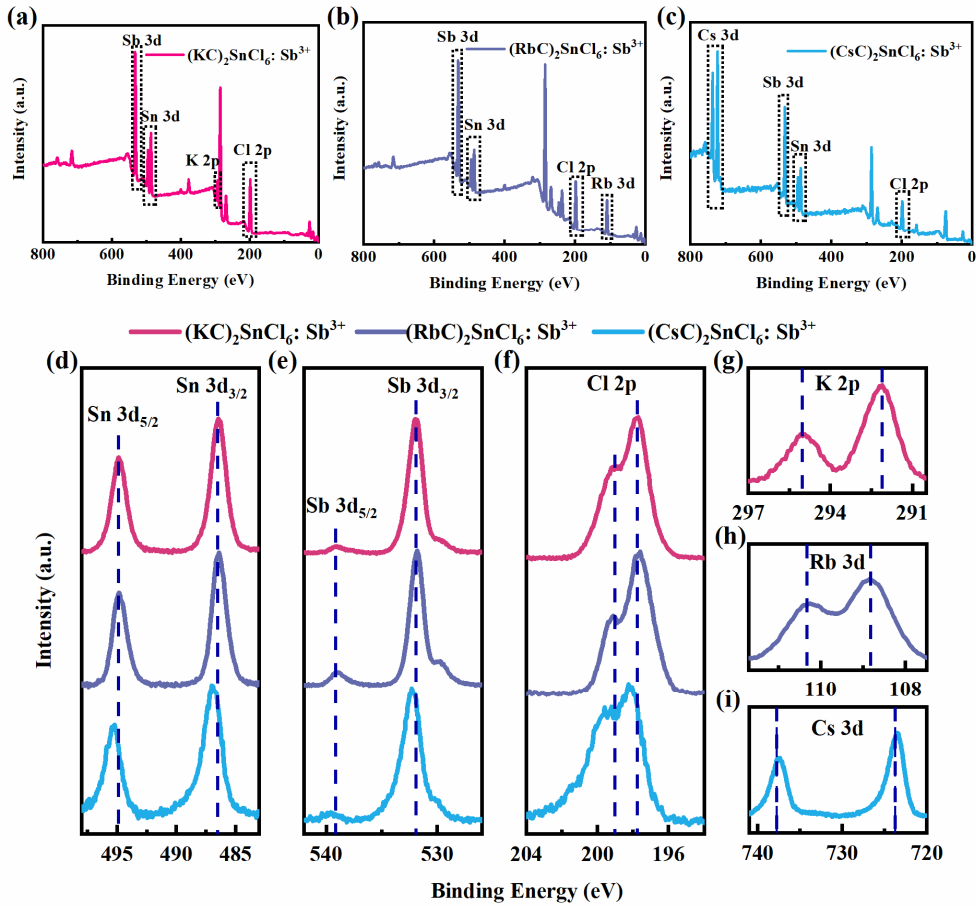

**Fig. S2** High-resolution XPS spectra of (a-c) all, (d) Sn 3d, (e) Sb 3d, (f) Cl 2p of  $\text{Sb}^{3+}$ -doped  $(AC)_2\text{SnCl}_6$ , (g) K 2p of  $\text{Sb}^{3+}$ -doped  $(\text{KC})_2\text{SnCl}_6$ , (h) Rb 3d of  $\text{Sb}^{3+}$ -doped  $(\text{RbC})_2\text{SnCl}_6$ , and (i) Cs 3d of  $\text{Sb}^{3+}$ -doped  $(\text{CsC})_2\text{SnCl}_6$ .

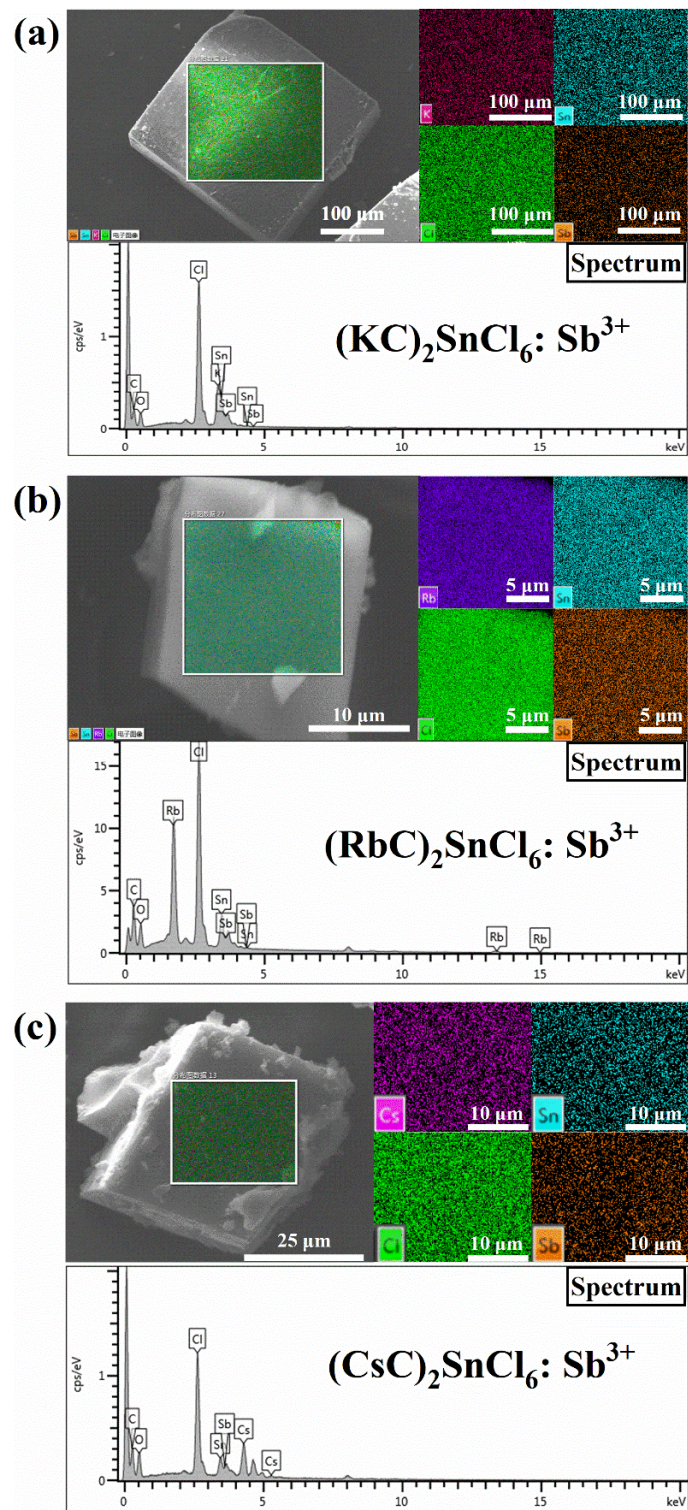

**Fig. S3** SEM and EDS data of  $\text{Sb}^{3+}$  doped (a)  $(\text{KC})_2\text{SnCl}_6$ , (b)  $(\text{RbC})_2\text{SnCl}_6$ , and (c)  $(\text{CsC})_2\text{SnCl}_6$ .



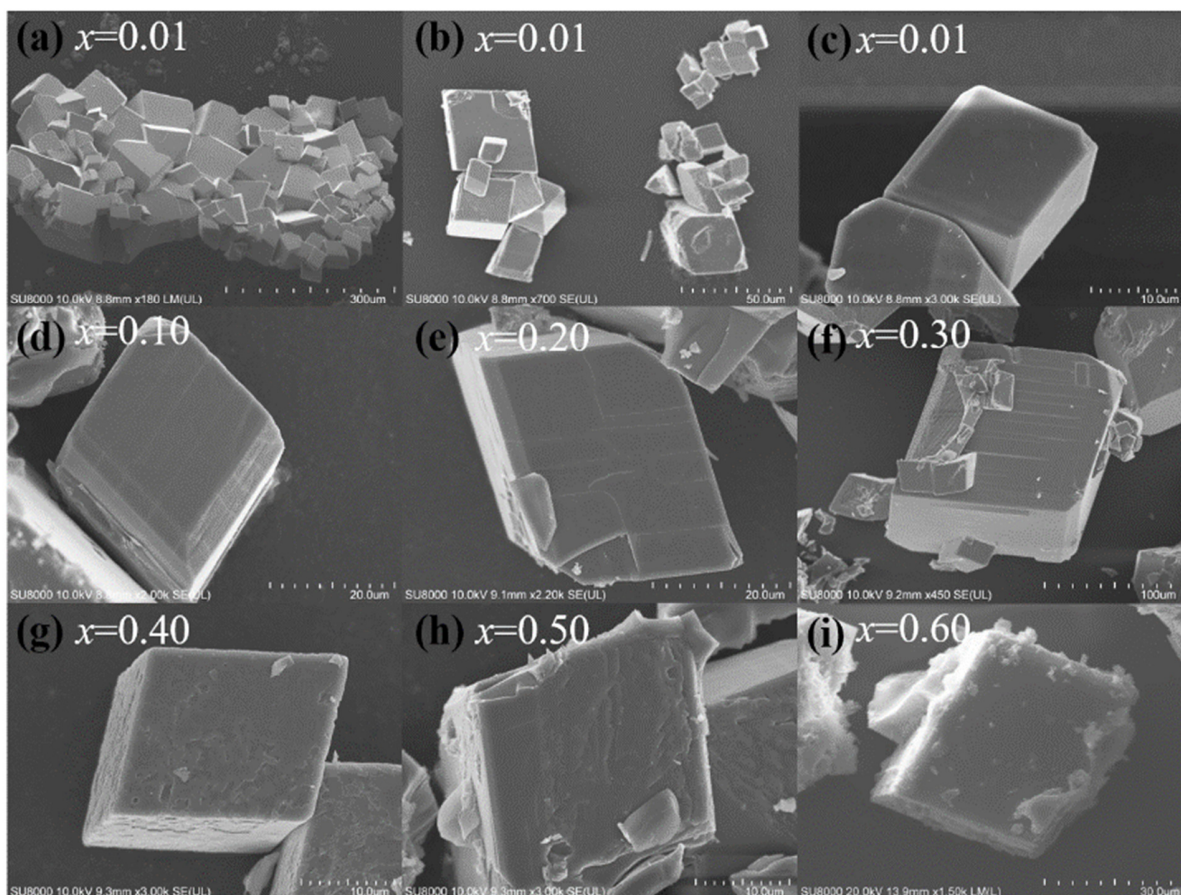

**Fig. S4** SEM images of  $(\text{CsC})_2\text{SnCl}_6$ :  $x\%$   $\text{Sb}^{3+}$  with various  $\text{Sb}^{3+}$  doping concentrations ( $x = 1-60$ ).

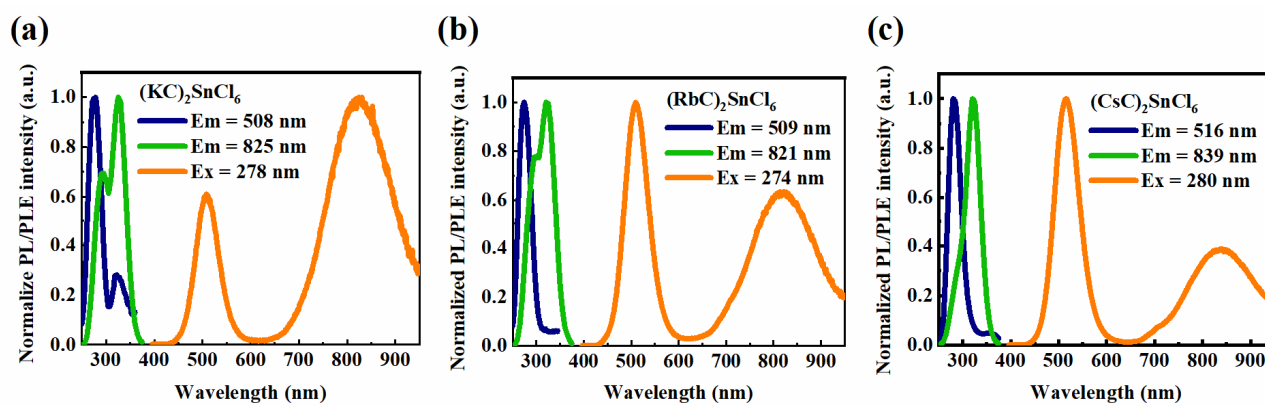

**Fig. S5** PLE and PL spectra of (a)  $(\text{KC})_2\text{SnCl}_6$ , (b)  $(\text{RbC})_2\text{SnCl}_6$ , and (c)  $(\text{CsC})_2\text{SnCl}_6$ .

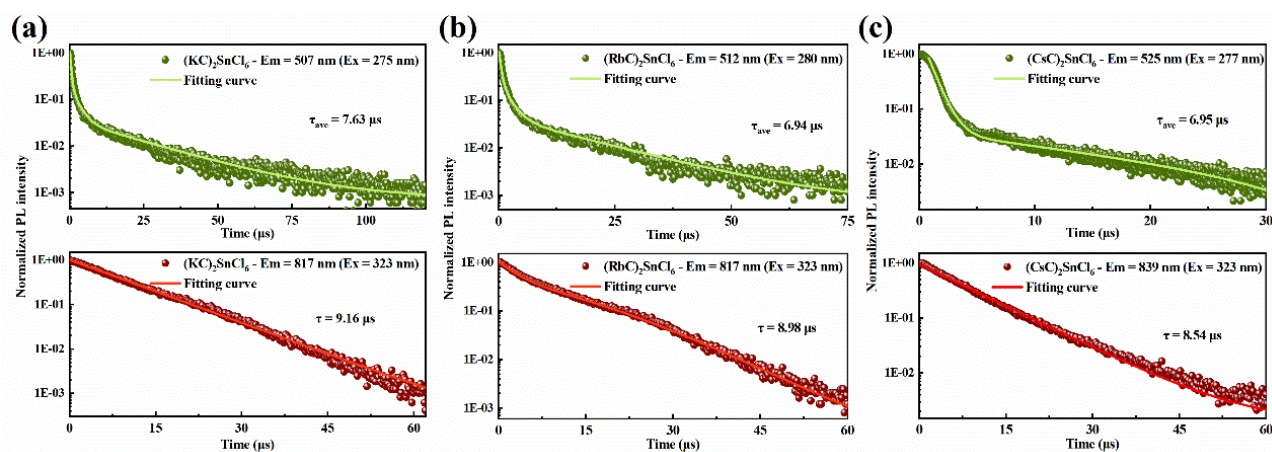

**Fig. S6** Decay lifetimes of (a)  $(\text{KC})_2\text{SnCl}_6$ , (b)  $(\text{RbC})_2\text{SnCl}_6$ , and (c)  $(\text{CsC})_2\text{SnCl}_6$ , monitored at high-energy emission band (top) and low-energy emission band, respectively (bottom).

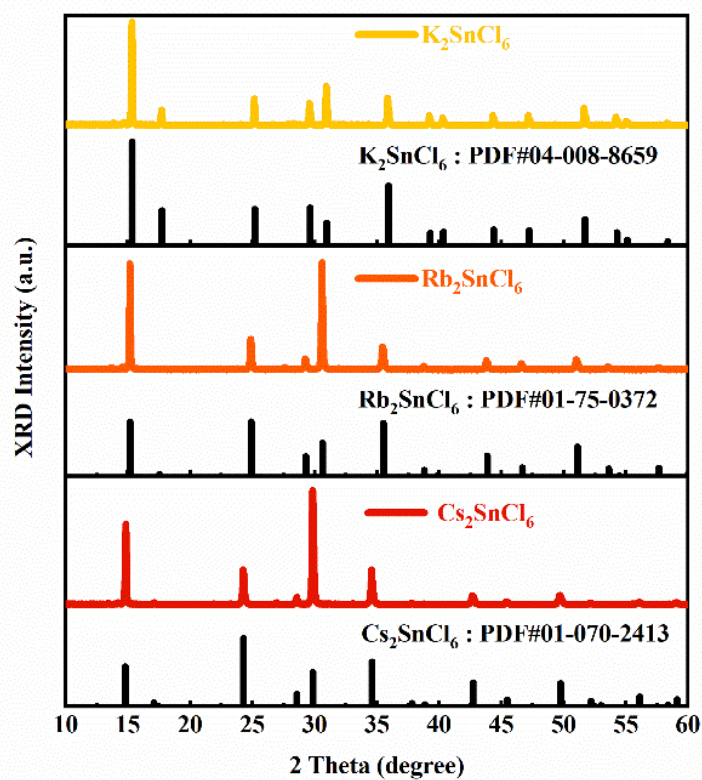

**Fig. S7** Simulated and experimental PXRD results of  $A_2\text{SnCl}_6$  ( $A = \text{K}, \text{Rb}, \text{and Cs}$ ).

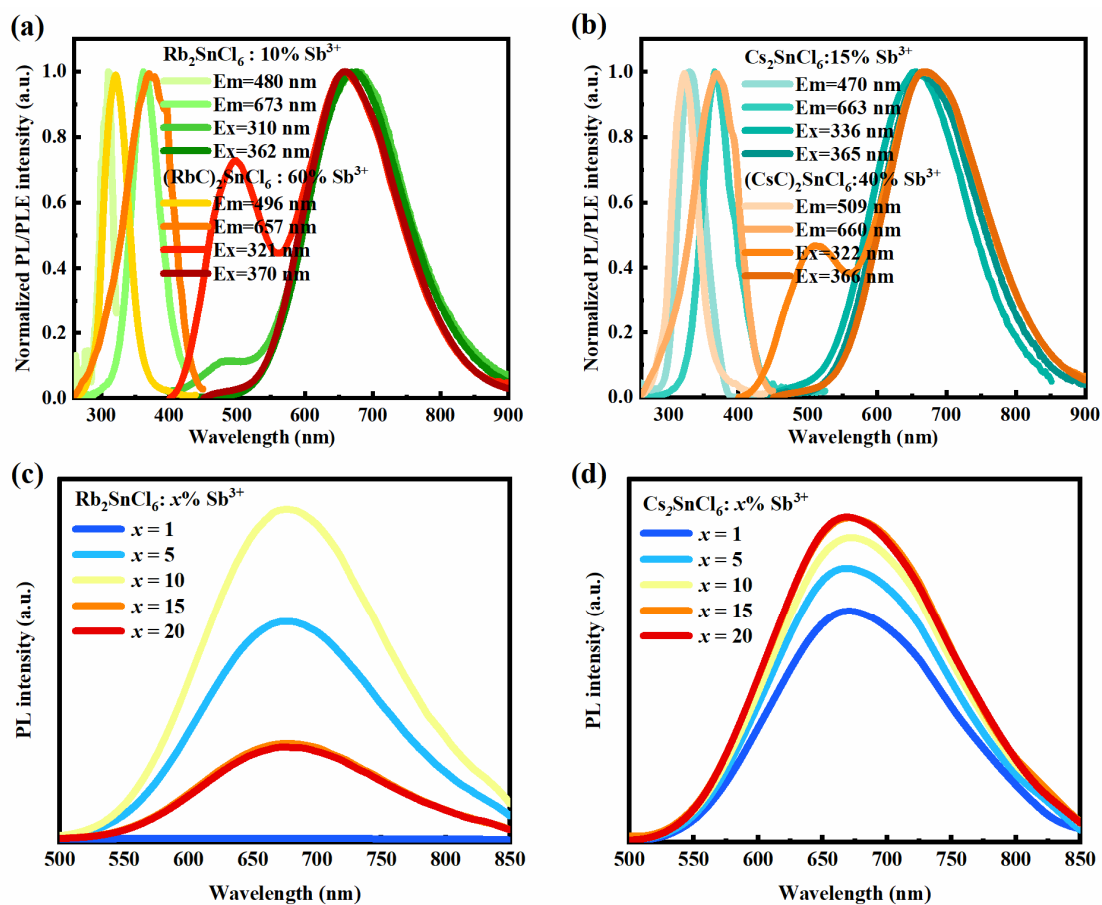

**Fig. S8** Comparison of PL and PLE spectra between Sb<sup>3+</sup>-doped (a) Rb<sub>2</sub>SnCl<sub>6</sub> and (RbC)<sub>2</sub>SnCl<sub>6</sub>, and (b) Cs<sub>2</sub>SnCl<sub>6</sub> and (CsC)<sub>2</sub>SnCl<sub>6</sub>. PL spectra of (c) Rb<sub>2</sub>SnCl<sub>6</sub>:x% Sb<sup>3+</sup> and (d) Cs<sub>2</sub>SnCl<sub>6</sub>:x% Sb<sup>3+</sup> under 365 nm excitation.

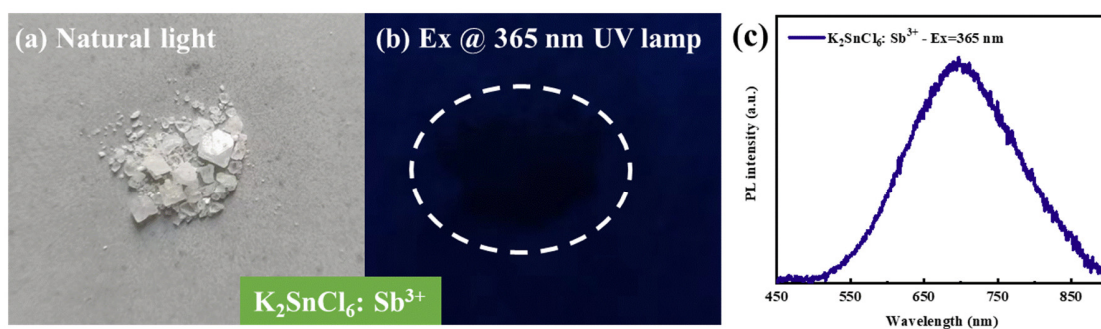

**Fig. S9** Optical images of K<sub>2</sub>SnCl<sub>6</sub>: Sb<sup>3+</sup> under (a) natural light and (b) 365 nm UV lamp. (c) PL spectrum of K<sub>2</sub>SnCl<sub>6</sub>: Sb<sup>3+</sup> under 365 nm excitation.



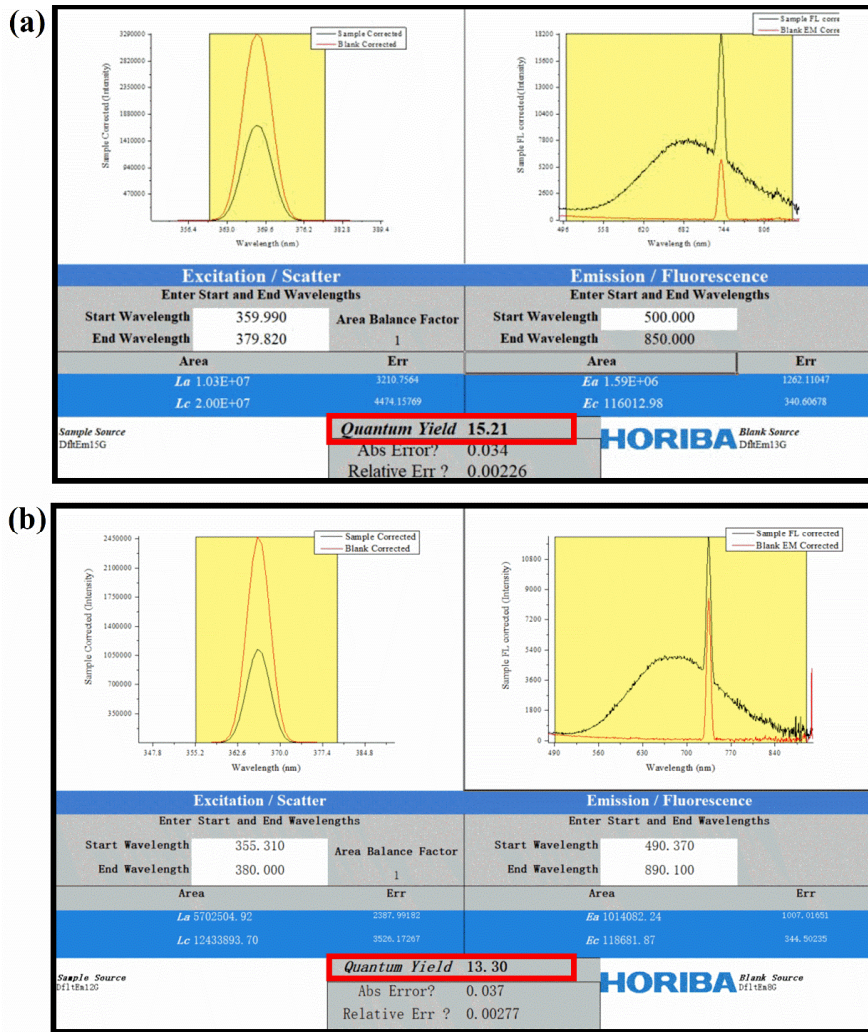

Fig. S10 PLQY of (a)  $Rb_2SnCl_6: 10\% Sb^{3+}$  and (b)  $Cs_2SnCl_6: 15\% Sb^{3+}$  under 365 nm excitation.

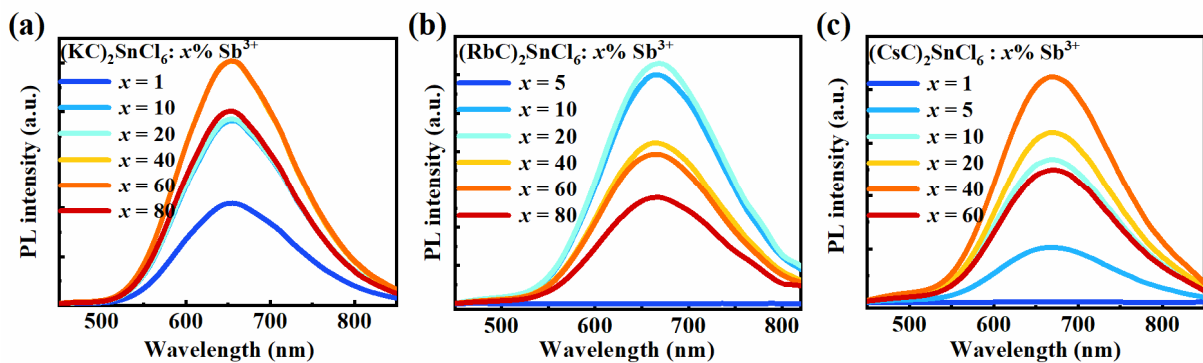

Fig. S11 PL spectra of varying doping concentrations of (a)  $(KC)_2SnCl_6:x\% Sb^{3+}$ , (b)  $(RbC)_2SnCl_6:x\% Sb^{3+}$  and (c)  $(CsC)_2SnCl_6:x\% Sb^{3+}$ , under 370 nm excitation.



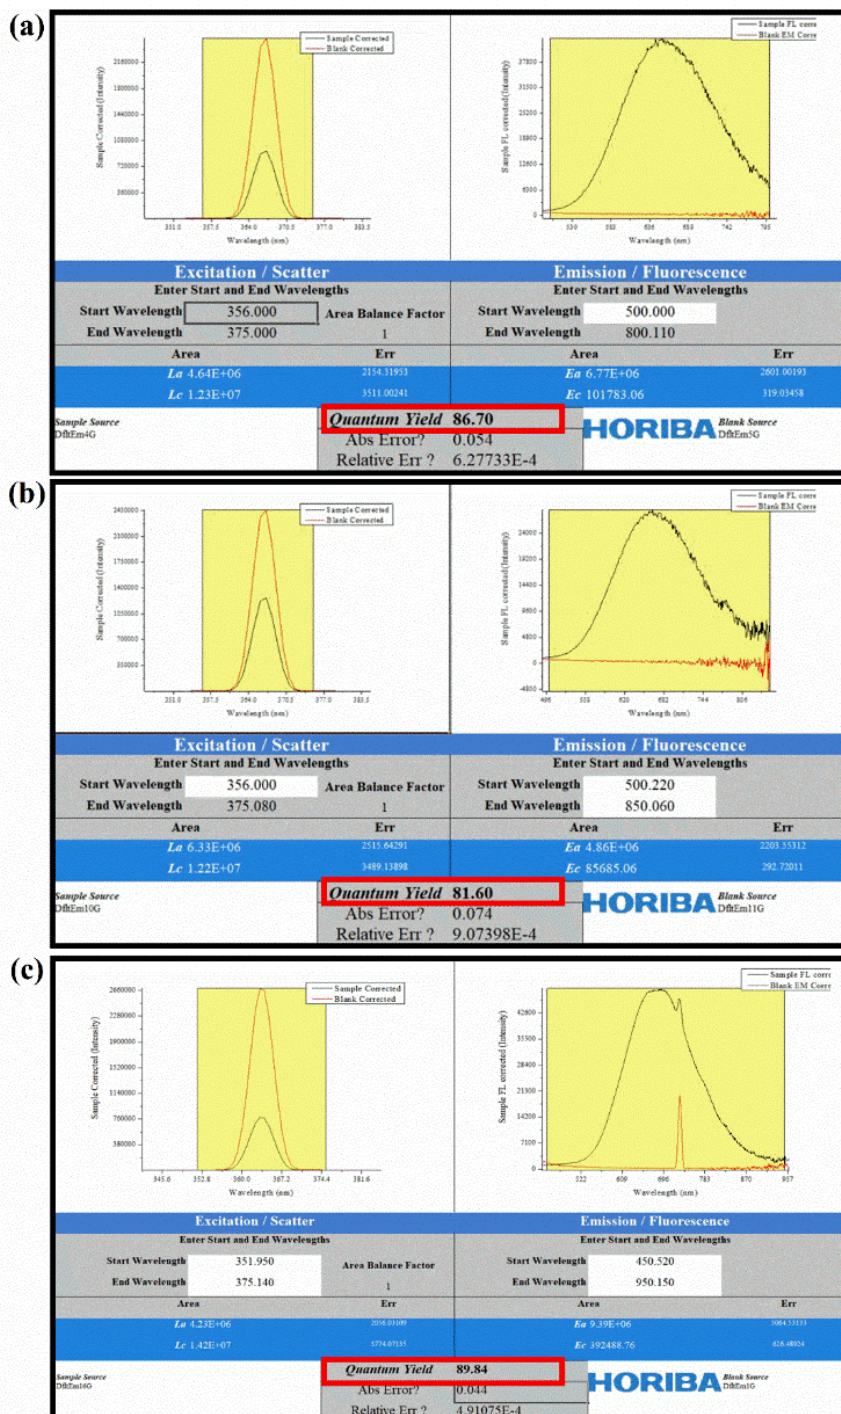

**Fig. S12** PLQY of (a)  $(\text{KC})_2\text{SnCl}_6$ : 60%  $\text{Sb}^{3+}$ , (b)  $(\text{RbC})_2\text{SnCl}_6$ : 20%  $\text{Sb}^{3+}$ , and (c)  $(\text{CsC})_2\text{SnCl}_6$ : 40%  $\text{Sb}^{3+}$  under 365 nm excitation.

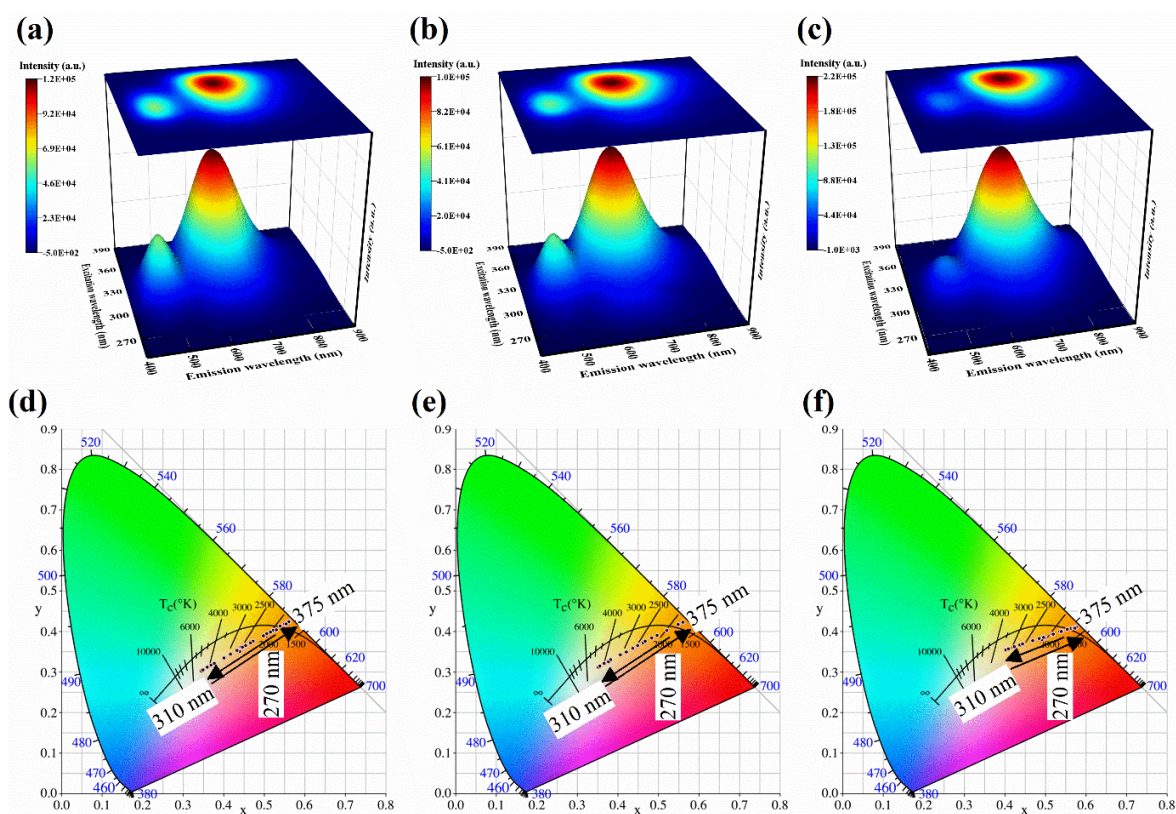

**Fig. S13** PLE wavelength dependent PL spectra of  $(AC)_2SnCl_6: Sb^{3+}$ .

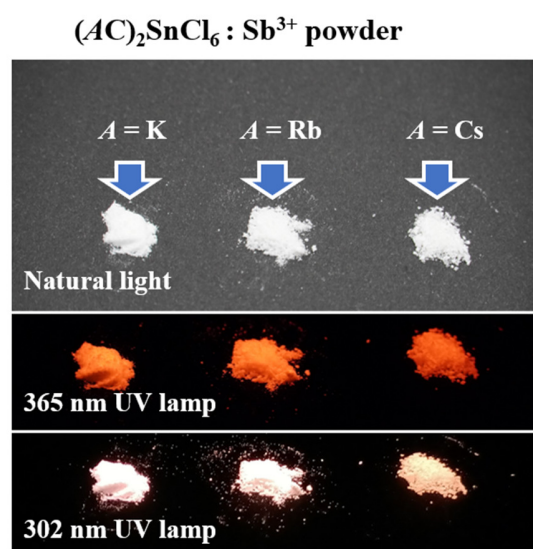

**Fig. S14** Optical pictures of (a)  $(CsC)_2SnCl_6: Sb^{3+}$  crystals and (b)  $(AC)_2SnCl_6: Sb^{3+}$  ( $A = K, Rb,$  and  $Cs$ ) powders under natural light, 365 nm, and 302 nm UV irradiation.



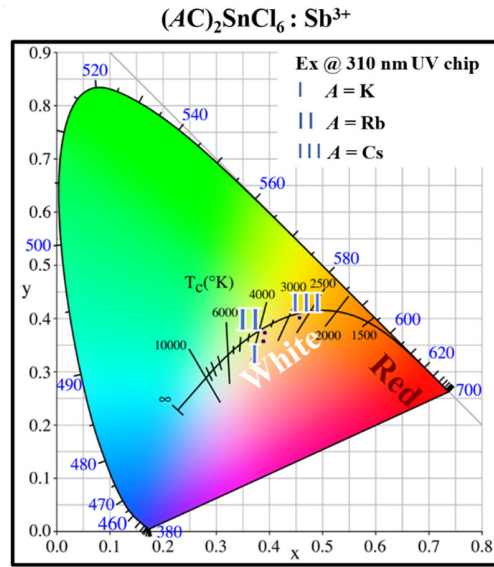

**Fig. S15** CIE coordinates of the single-component WLED based on  $Sb^{3+}$ -doped  $(AC)_2SnCl_6$  powders with a 310 nm UV chip.

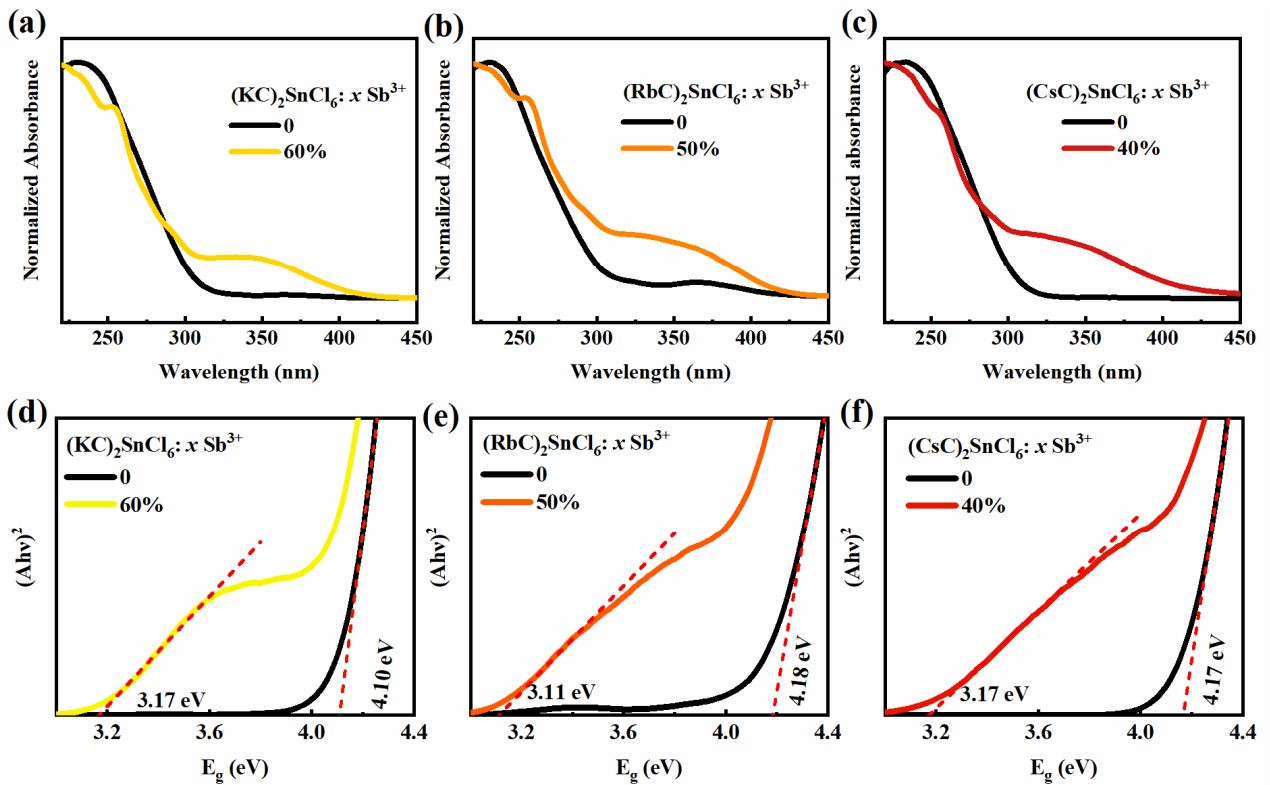

**Fig. S16** (a-c) The (a-c) absorption spectra and (d-f) the bandgap value determined by the Tauc plots of pristine and  $Sb^{3+}$  doped  $(AC)_2SnCl_6$ ,  $A = K, Rb,$  and  $Cs$ , respectively.

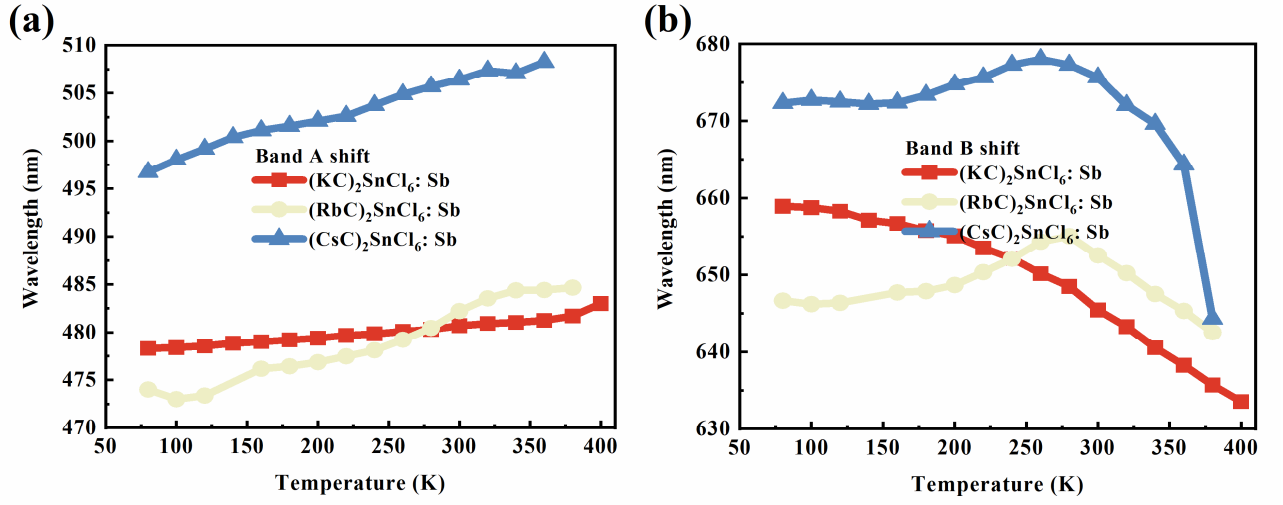

Fig. S17 The Band A and Band B position under various temperatures.

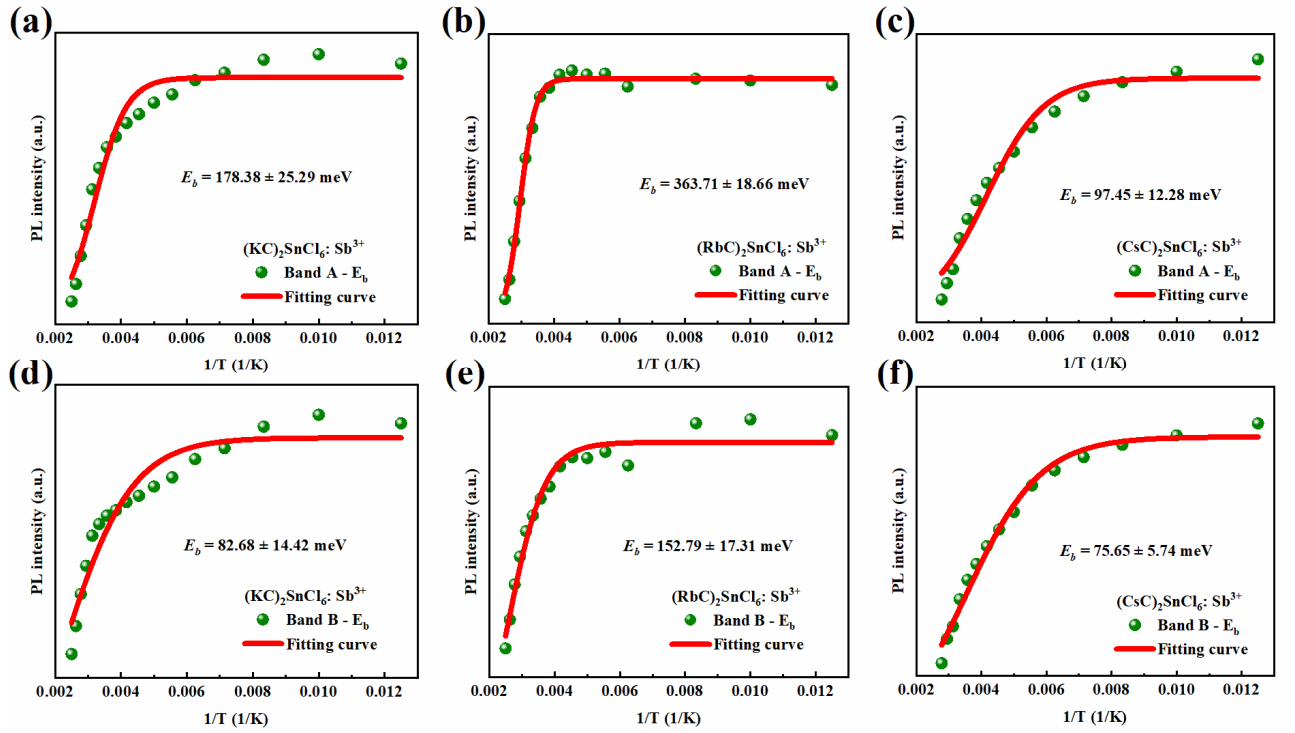

Fig. S18 Integrated PL intensity of (a-c) Band A and (d-f) Band B of  $(\text{AC})_2\text{SnCl}_6:\text{Sb}^{3+}$  as a function of  $1/T$ .



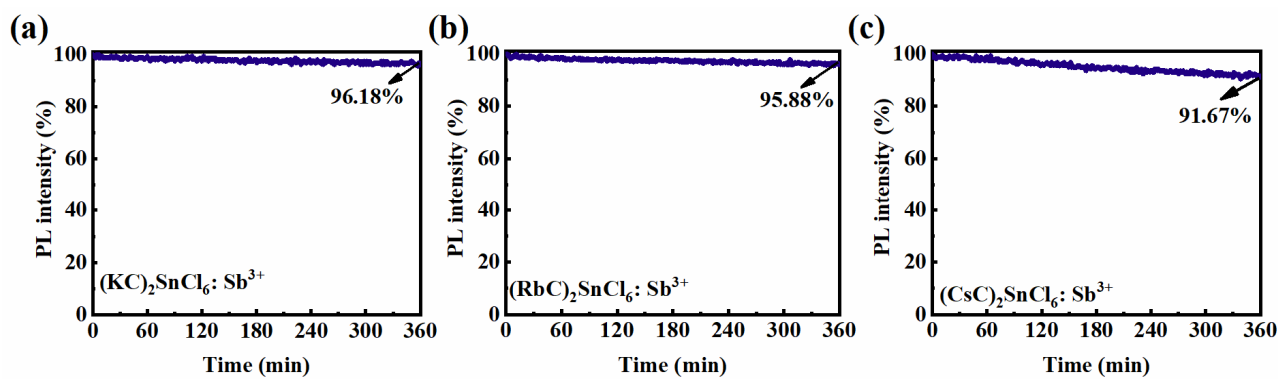

**Fig. S19** PL stability of  $\text{Sb}^{3+}$ -doped (a)  $(\text{KC})_2\text{SnCl}_6$ , (b)  $(\text{RbC})_2\text{SnCl}_6$ , and (c)  $(\text{CsC})_2\text{SnCl}_6$  under 322 nm UV continuous illumination.

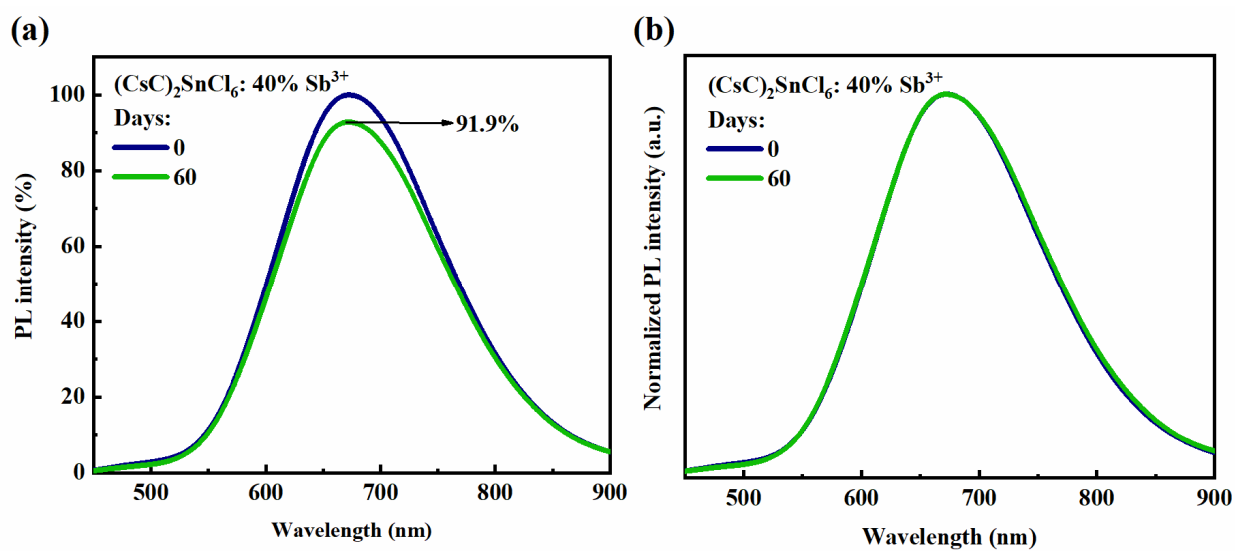

**Fig. S20** (a) PL stability and (b) peak position of 40%  $\text{Sb}^{3+}$ -doped  $(\text{CsC})_2\text{SnCl}_6$  at pristine and after 60 days.

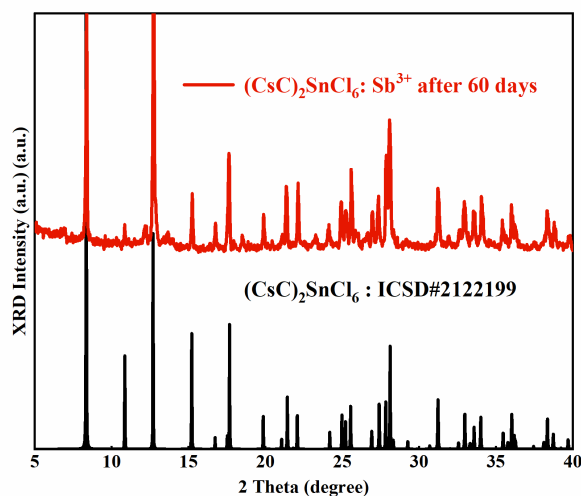

**Fig. S21** PXR D patterns of the  $\text{Sb}^{3+}$ -doped  $(\text{CsC})_2\text{SnCl}_6$  powder stored at ambient 60 days (red), and the simulated of ICSD#2122199 (black).

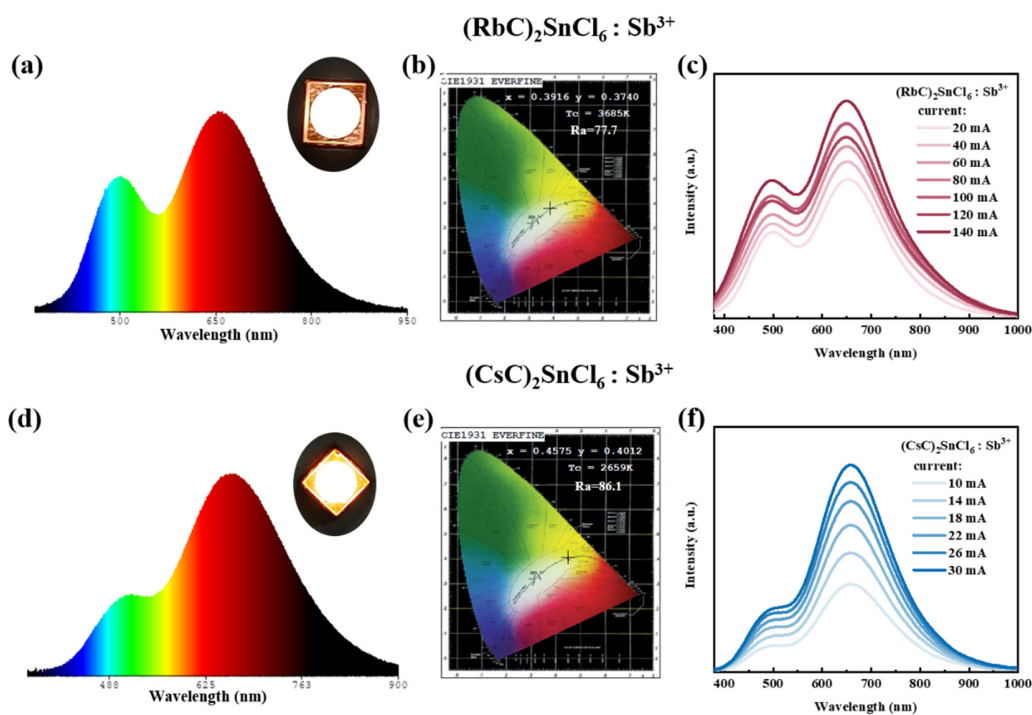

**Fig. S22** Spectrum, WLED parameters, and drive current-dependent spectra of the single-component WLED based on  $\text{Sb}^{3+}$ -doped (a-c)  $(\text{RbC})_2\text{SnCl}_6$  and (d-f)  $(\text{CsC})_2\text{SnCl}_6$  powders, using a 310 nm UV chip. The inset in (a) and (d) exhibits the optical images of the WLED.

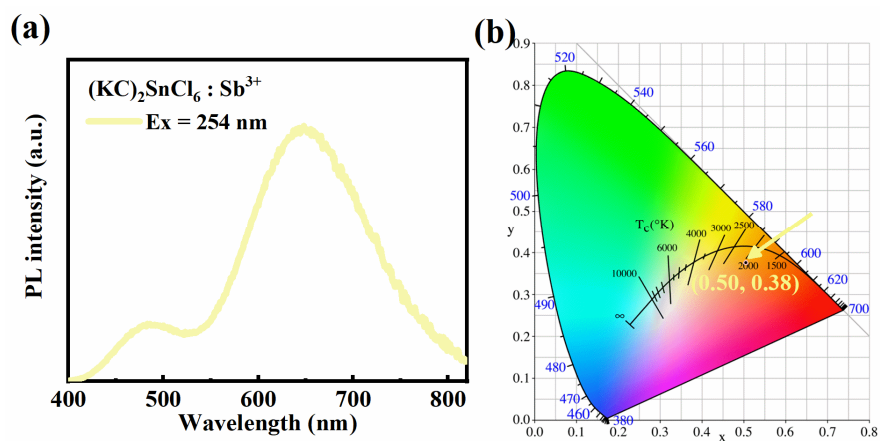

Fig. S23 PL spectrum and CIE coordinates of  $(\text{KC})_2\text{SnCl}_6: \text{Sb}^{3+}$  under 254 nm UV excitation.

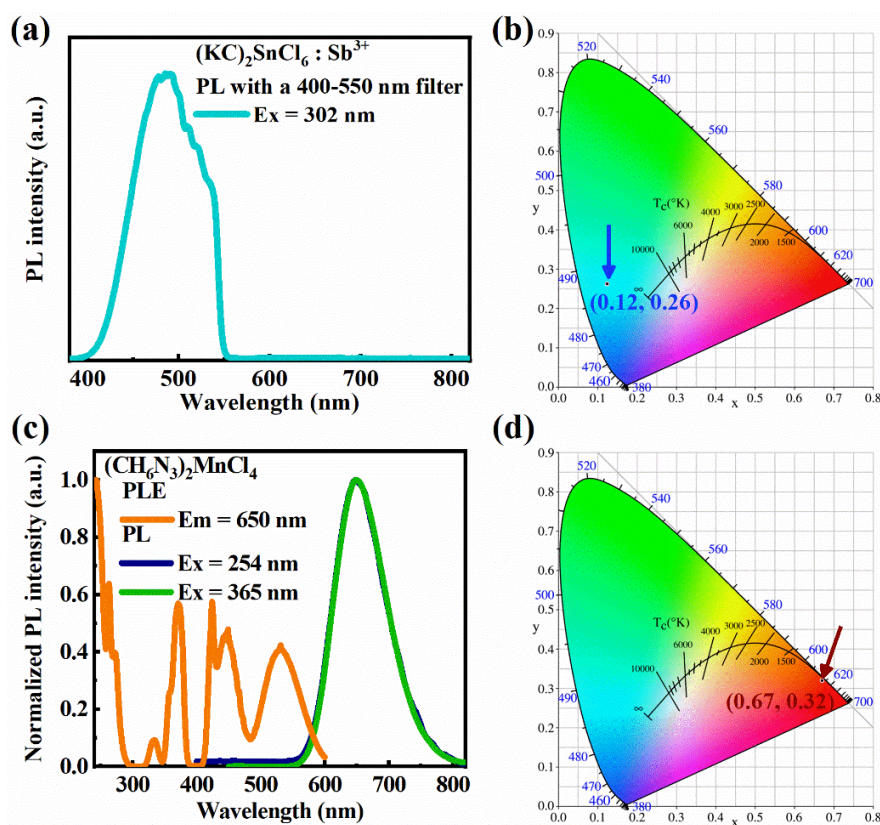

Fig. S24 PL spectrum (a) and CIE color coordinates (b) of  $(\text{KC})_2\text{SnCl}_6: \text{Sb}^{3+}$  under 302 nm UV excitation with a 400-550 nm filter. PL and PLE spectra of  $(\text{CH}_6\text{N}_3)_2\text{MnCl}_4$  (c) and the CIE color coordinates under 365 nm UV excitation.
